# Supplementary material for: Producing sustainable binding materials using marble waste blended with fly ash and rice husk ash for building materials
Source: publisher site journal article supplement (doi:10.1515/rams-2024-0049), 2024-01-01
Supplement: Supplementary file 1 [file rams-2024-0049_sm.xlsx]

## Sheet: MCSS500
Article Title: Producing sustainable binding material using marble waste blended with fly ash and rice husk ask for building materials
Journal: Reviews on Advanced Materials Science
Source of Experimental Data: https://doi.org/10.1016/j.rineng.2023.101435
Marble cement (kg/m3)	Fly ash (kg/m3)	Rice husk ash (kg/m3)	Testing age (days)	CS (MPa)	FS (MPa)
492	0	0	28	6.79	1.79
492	0	0	28	6.36	1.46
492	0	0	28	6.31	2.31
393.6	98.4	0	28	7.36	2.16
393.6	98.4	0	28	7.15	2.02
393.6	98.4	0	28	7.72	1.72
344.4	147.6	0	28	7.71	1.86
344.4	147.6	0	28	7.51	2.51
344.4	147.6	0	28	7.96	1.96
295.2	196.8	0	28	8.64	2.64
295.2	196.8	0	28	7.54	2.5
295.2	196.8	0	28	7.87	2.28
393.6	0	98.4	28	8.24	2.26
393.6	0	98.4	28	8.91	2.92
393.6	0	98.4	28	8.36	2.68
344.4	0	147.6	28	9.17	2.64
344.4	0	147.6	28	8.52	2.42
344.4	0	147.6	28	9.23	3.02
295.2	0	196.8	28	10.68	2.18
295.2	0	196.8	28	7.64	2.44
295.2	0	196.8	28	6.64	2.96
492	0	0	91	10.84	2.54
492	0	0	91	11.32	3.32
492	0	0	91	10.98	2.38
393.6	98.4	0	91	11.91	2.91
393.6	98.4	0	91	12.44	3.56
393.6	98.4	0	91	12.79	2.79
344.4	147.6	0	91	13.38	3.38
344.4	147.6	0	91	13.6	3.28
344.4	147.6	0	91	13.52	2.98
295.2	196.8	0	91	14.44	3.44
295.2	196.8	0	91	14.82	3.82
295.2	196.8	0	91	14.7	2.7
393.6	0	98.4	91	16.78	3.78
393.6	0	98.4	91	15.84	2.81
393.6	0	98.4	91	15.98	3.98
344.4	0	147.6	91	16.43	3.62
344.4	0	147.6	91	16.8	3.8
344.4	0	147.6	91	17.46	3.46
295.2	0	196.8	91	15.21	4.02
295.2	0	196.8	91	16.19	3.14
295.2	0	196.8	91	14.96	3.14
492	0	0	182	15.65	2.92
492	0	0	182	16.5	3.5
492	0	0	182	16.12	3.22
393.6	98.4	0	182	17.08	4.08
393.6	98.4	0	182	17.34	3.3
393.6	98.4	0	182	18.04	3.04
344.4	147.6	0	182	18.79	3.52
344.4	147.6	0	182	17.98	3.24
344.4	147.6	0	182	18.96	3.92
295.2	196.8	0	182	19.29	4.12
295.2	196.8	0	182	19.95	3.68
295.2	196.8	0	182	19.2	3.34
393.6	0	98.4	182	20.58	3.58
393.6	0	98.4	182	21.45	4.46
393.6	0	98.4	182	18.82	3.84
344.4	0	147.6	182	20.32	4.32
344.4	0	147.6	182	22.72	4.72
344.4	0	147.6	182	20.54	3.54
295.2	0	196.8	182	20.56	3.56
295.2	0	196.8	182	20.34	4.24
295.2	0	196.8	182	18.56	3.56
492	0	0	364	20.7	3.78
492	0	0	364	19.68	3.68
492	0	0	364	19.45	3.54
393.6	98.4	0	364	21.7	3.46
393.6	98.4	0	364	22.38	4.04
393.6	98.4	0	364	20.04	4.02
344.4	147.6	0	364	22.98	3.72
344.4	147.6	0	364	20.82	3.82
344.4	147.6	0	364	21.88	4.28
295.2	196.8	0	364	23.04	4.34
295.2	196.8	0	364	22.12	4.18
295.2	196.8	0	364	22.61	3.76
393.6	0	98.4	364	23.95	3.98
393.6	0	98.4	364	24.49	4.66
393.6	0	98.4	364	23.33	4.92
344.4	0	147.6	364	25.86	5.58
344.4	0	147.6	364	24.56	4.58
344.4	0	147.6	364	24.78	4.78
295.2	0	196.8	364	21.98	3.98
295.2	0	196.8	364	21.92	4.62
295.2	0	196.8	364	22.05	4.26
492	0	0	364	19.68	3.68
295.2	0	196.8	182	18.56	3.5
295.2	0	196.8	91	14.96	3.38
344.4	0	147.6	28	8.52	4.02
344.4	0	147.6	91	16.8	3.02
492	0	0	91	11.32	2.92
344.4	0	147.6	91	17.46	3.14
393.6	98.4	0	28	7.36	1.72
344.4	147.6	0	182	18.79	4.08
295.2	0	196.8	28	6.64	4.92
344.4	0	147.6	364	24.78	2.31
492	0	0	182	16.12	2.92
344.4	147.6	0	182	18.96	4.26
393.6	98.4	0	364	21.7	1.72
393.6	0	98.4	364	23.33	1.46
344.4	0	147.6	28	9.17	5.58
344.4	0	147.6	364	24.78	4.34
295.2	0	196.8	182	20.34	3.54
344.4	147.6	0	364	21.88	3.56
295.2	0	196.8	28	6.64	1.72
393.6	98.4	0	28	7.72	4.02
393.6	0	98.4	364	23.95	2.68
344.4	147.6	0	28	7.51	2.92
295.2	0	196.8	182	20.56	3.92
393.6	0	98.4	182	21.45	3.98
492	0	0	364	19.68	2.38
344.4	0	147.6	182	20.32	3.84
344.4	0	147.6	182	22.72	4.92
344.4	0	147.6	91	16.43	3.46
295.2	196.8	0	91	14.7	2.5
295.2	0	196.8	28	7.64	2.5
492	0	0	28	6.36	3.68
393.6	98.4	0	182	18.04	3.14
295.2	196.8	0	364	22.61	4.46
295.2	0	196.8	91	16.19	3.46
295.2	0	196.8	28	7.64	3.78
344.4	147.6	0	364	22.98	2.02
295.2	0	196.8	28	6.64	3.46
492	0	0	364	19.45	2.26
295.2	0	196.8	364	21.98	3.84
344.4	147.6	0	91	13.38	4.46
492	0	0	28	6.79	3.44
295.2	0	196.8	28	10.68	2.02
492	0	0	182	16.5	3.56
344.4	0	147.6	28	8.52	2.92
344.4	147.6	0	364	21.88	4.04
393.6	98.4	0	182	17.34	3.82
344.4	0	147.6	91	16.43	3.76
393.6	0	98.4	182	21.45	4.58
344.4	147.6	0	28	7.71	3.56
393.6	98.4	0	364	22.38	3.44
393.6	0	98.4	364	23.33	4.26
393.6	98.4	0	364	22.38	3.04
344.4	147.6	0	91	13.6	3.46
393.6	98.4	0	364	20.04	3.02
344.4	0	147.6	182	20.32	1.46
295.2	196.8	0	364	22.61	3.68
492	0	0	182	15.65	3.3
344.4	0	147.6	182	22.72	3.76
344.4	0	147.6	91	17.46	3.98
492	0	0	182	15.65	3.56
393.6	0	98.4	182	21.45	3.58
295.2	196.8	0	364	22.61	4.04
492	0	0	364	19.45	4.46
393.6	98.4	0	182	18.04	2.38
344.4	147.6	0	182	17.98	3.82
295.2	196.8	0	182	19.2	2.42
344.4	147.6	0	28	7.71	3.56
295.2	196.8	0	364	22.61	3.62
344.4	147.6	0	91	13.38	3.3
344.4	0	147.6	364	25.86	3.76
393.6	98.4	0	28	7.72	2.44
393.6	98.4	0	364	21.7	3.24
295.2	0	196.8	91	16.19	4.12
492	0	0	364	19.68	3.5
344.4	0	147.6	91	17.46	2.81
295.2	196.8	0	91	14.82	1.72
344.4	147.6	0	182	18.96	4.62
344.4	0	147.6	28	9.23	2.54
344.4	147.6	0	28	7.71	3.3
295.2	0	196.8	28	7.64	1.96
295.2	196.8	0	364	23.04	2.44
344.4	0	147.6	28	9.23	2.96
492	0	0	182	16.5	1.79
492	0	0	28	6.31	4.32
344.4	147.6	0	28	7.96	4.72
344.4	0	147.6	364	24.78	4.18
344.4	0	147.6	91	17.46	3.72
492	0	0	182	16.5	3.82
295.2	0	196.8	182	20.34	3.92
344.4	0	147.6	364	24.78	3.98
344.4	147.6	0	364	22.98	2.7
344.4	0	147.6	182	22.72	2.38
393.6	0	98.4	182	18.82	4.08
344.4	0	147.6	364	24.78	1.96
393.6	0	98.4	364	24.49	3.44
295.2	196.8	0	364	22.61	3.24
344.4	0	147.6	182	20.54	4.92
393.6	0	98.4	182	21.45	3.82
492	0	0	91	10.84	4.02
295.2	0	196.8	182	20.56	3.46
295.2	0	196.8	182	18.56	2.54
295.2	196.8	0	91	14.44	4.12
393.6	98.4	0	28	7.15	2.51
492	0	0	28	6.36	3.78
393.6	98.4	0	182	17.08	3.76
393.6	0	98.4	91	15.84	2.31
492	0	0	182	16.5	3.58
295.2	0	196.8	182	20.56	2.42
295.2	196.8	0	364	22.12	3.84
492	0	0	91	10.84	2.5
344.4	0	147.6	28	8.52	3.14
492	0	0	182	16.12	3.68
492	0	0	28	6.31	2.38
393.6	0	98.4	182	21.45	3.54
295.2	0	196.8	364	21.98	2.98
295.2	0	196.8	364	22.05	3.84
295.2	196.8	0	91	14.7	5.58
295.2	0	196.8	182	20.34	3.78
344.4	147.6	0	364	20.82	3.82
344.4	0	147.6	364	24.78	2.02
295.2	196.8	0	182	19.95	3.76
295.2	0	196.8	182	20.56	4.78
344.4	0	147.6	182	20.54	4.66
295.2	196.8	0	28	7.87	3.04
295.2	196.8	0	28	8.64	4.34
492	0	0	364	19.45	2.28
393.6	98.4	0	91	11.91	3.68
344.4	147.6	0	28	7.71	3.84
344.4	147.6	0	91	13.6	2.28
295.2	0	196.8	28	6.64	5.58
393.6	98.4	0	364	21.7	2.91
295.2	0	196.8	182	20.56	3.14
344.4	0	147.6	28	8.52	3.14
344.4	147.6	0	91	13.6	4.02
344.4	147.6	0	364	20.82	4.46
344.4	147.6	0	28	7.51	2.18
393.6	98.4	0	91	11.91	2.81
393.6	0	98.4	28	8.24	3.04
393.6	0	98.4	182	20.58	3.5
393.6	0	98.4	28	8.91	3.56
295.2	0	196.8	91	14.96	3.56
393.6	0	98.4	28	8.91	3.46
344.4	147.6	0	91	13.38	4.66
344.4	0	147.6	364	24.56	2.81
492	0	0	182	16.12	2.51
295.2	0	196.8	91	16.19	4.08
344.4	0	147.6	364	24.78	4.92
295.2	196.8	0	182	19.95	2.5
344.4	0	147.6	364	24.56	2.26
393.6	98.4	0	91	11.91	4.12
295.2	196.8	0	364	22.12	3.76
393.6	0	98.4	28	8.24	3.24
344.4	147.6	0	182	18.96	2.96
492	0	0	91	10.84	3.56
344.4	147.6	0	91	13.38	2.96
295.2	196.8	0	28	8.64	3.76
295.2	196.8	0	91	14.44	3.78
295.2	196.8	0	364	22.12	2.5
344.4	147.6	0	182	18.79	3.32
393.6	0	98.4	91	15.84	3.38
393.6	98.4	0	182	18.04	2.96
393.6	98.4	0	182	17.34	3.72
393.6	0	98.4	364	24.49	2.02
393.6	98.4	0	28	7.15	3.54
393.6	0	98.4	91	15.84	3.24
492	0	0	364	20.7	1.46
344.4	0	147.6	28	9.23	4.18
492	0	0	91	11.32	3.56
393.6	0	98.4	91	15.98	4.92
492	0	0	364	19.68	2.64
295.2	0	196.8	91	15.21	2.91
295.2	196.8	0	91	14.82	2.92
295.2	196.8	0	182	19.95	3.98
344.4	0	147.6	182	22.72	4.46
295.2	0	196.8	364	21.98	3.72
295.2	196.8	0	91	14.7	4.92
344.4	147.6	0	364	21.88	2.18
393.6	0	98.4	182	18.82	1.72
344.4	0	147.6	182	20.32	4.26
344.4	0	147.6	364	24.56	3.8
344.4	0	147.6	364	24.78	2.42
393.6	0	98.4	91	15.98	2.31
393.6	0	98.4	364	23.95	3.68
295.2	0	196.8	182	20.34	3.28
344.4	0	147.6	28	9.17	3.46
492	0	0	91	11.32	2.44
295.2	196.8	0	364	22.12	3.78
344.4	0	147.6	28	9.17	2.92
492	0	0	28	6.31	2.91
344.4	0	147.6	182	20.32	4.04
492	0	0	364	19.68	3.92
295.2	196.8	0	182	19.29	4.08
295.2	0	196.8	182	20.56	2.5
492	0	0	182	15.65	4.08
295.2	0	196.8	28	7.64	2.28
393.6	98.4	0	182	18.04	4.28
393.6	0	98.4	182	18.82	3.92
492	0	0	364	19.68	1.96
295.2	0	196.8	91	16.19	2.96
295.2	196.8	0	364	23.04	4.26
393.6	98.4	0	28	7.15	3.68
492	0	0	364	19.45	3.5
492	0	0	182	16.5	3.32
393.6	98.4	0	91	12.79	3.84
295.2	196.8	0	91	14.7	2.98
393.6	98.4	0	28	7.15	2.92
393.6	98.4	0	28	7.36	3.44
393.6	0	98.4	182	20.58	3.54
344.4	0	147.6	28	9.17	4.62
295.2	196.8	0	364	23.04	2.64
295.2	196.8	0	364	22.61	3.56
393.6	98.4	0	28	7.72	4.24
295.2	0	196.8	28	6.64	4.32
393.6	98.4	0	364	21.7	1.46
344.4	147.6	0	182	17.98	3.52
344.4	0	147.6	364	25.86	4.02
393.6	98.4	0	182	17.34	3.78
492	0	0	182	16.12	3.62
393.6	98.4	0	182	17.34	2.54
492	0	0	91	11.32	3.44
344.4	0	147.6	91	16.43	1.96
344.4	0	147.6	182	20.32	3.28
393.6	0	98.4	182	20.58	4.46
295.2	196.8	0	91	14.7	3.78
295.2	0	196.8	182	18.56	4.02
295.2	0	196.8	91	15.21	2.98
295.2	0	196.8	364	22.05	2.64
295.2	196.8	0	182	19.2	3.14
295.2	0	196.8	182	18.56	3.56
344.4	0	147.6	364	24.56	2.18
295.2	0	196.8	182	18.56	2.44
492	0	0	91	10.84	3.68
344.4	0	147.6	364	25.86	3.76
492	0	0	28	6.79	3.78
344.4	0	147.6	91	16.43	3.46
492	0	0	91	10.98	3.5
295.2	0	196.8	28	10.68	4.12
393.6	0	98.4	28	8.36	4.02
492	0	0	28	6.31	3.46
344.4	0	147.6	182	20.54	3.14
492	0	0	91	10.98	4.72
295.2	196.8	0	364	22.61	4.62
344.4	147.6	0	91	13.52	3.62
492	0	0	91	10.98	2.26
393.6	98.4	0	182	17.08	3.54
344.4	0	147.6	28	9.23	4.24
492	0	0	364	20.7	3.3
344.4	147.6	0	91	13.6	2.18
344.4	147.6	0	91	13.52	2.92
492	0	0	91	10.84	4.04
393.6	0	98.4	182	21.45	3.22
393.6	0	98.4	91	16.78	2.68
344.4	147.6	0	182	17.98	3.56
393.6	0	98.4	364	23.33	4.46
393.6	98.4	0	182	17.34	1.46
492	0	0	182	16.5	2.18
393.6	0	98.4	364	23.33	3.04
295.2	0	196.8	91	15.21	4.02
492	0	0	91	10.84	4.28
295.2	0	196.8	182	20.56	5.58
344.4	147.6	0	91	13.6	3.82
344.4	0	147.6	91	16.43	2.54
393.6	98.4	0	28	7.15	4.04
492	0	0	28	6.36	3.52
295.2	196.8	0	182	19.95	3.82
393.6	98.4	0	28	7.72	1.46
393.6	98.4	0	182	17.08	3.68
295.2	196.8	0	364	22.61	4.66
393.6	0	98.4	182	18.82	3.24
393.6	0	98.4	28	8.91	2.7
393.6	0	98.4	364	23.33	4.58
393.6	98.4	0	91	12.44	1.96
393.6	0	98.4	364	23.33	2.64
492	0	0	28	6.36	3.92
295.2	0	196.8	28	6.64	4.18
393.6	0	98.4	364	23.95	3.68
295.2	0	196.8	28	10.68	4.12
344.4	0	147.6	28	8.52	2.98
295.2	196.8	0	91	14.82	4.02
295.2	0	196.8	28	6.64	1.72
295.2	196.8	0	91	14.44	3.62
393.6	98.4	0	28	7.72	2.38
295.2	196.8	0	28	7.54	2.64
344.4	147.6	0	364	20.82	3.46
393.6	98.4	0	182	18.04	2.81
344.4	147.6	0	364	21.88	1.79
492	0	0	182	15.65	4.72
393.6	0	98.4	28	8.36	3.24
344.4	0	147.6	182	22.72	3.76
393.6	98.4	0	28	7.15	3.98
295.2	0	196.8	364	21.92	2.18
492	0	0	364	20.7	4.02
492	0	0	182	16.12	4.72
295.2	0	196.8	364	21.92	3.46
492	0	0	91	11.32	2.7
344.4	0	147.6	28	8.52	2.44
492	0	0	91	11.32	3.46
344.4	0	147.6	28	9.17	3.76
344.4	0	147.6	182	22.72	3.82
393.6	0	98.4	91	16.78	4.32
393.6	0	98.4	182	20.58	1.72
295.2	0	196.8	364	21.92	2.02
393.6	0	98.4	28	8.36	2.7
492	0	0	364	20.7	2.54
344.4	0	147.6	182	20.54	3.34
492	0	0	182	16.5	3.24
393.6	98.4	0	91	11.91	3.52
295.2	0	196.8	91	15.21	2.16
295.2	196.8	0	364	23.04	2.28
295.2	0	196.8	91	16.19	3.78
393.6	0	98.4	91	15.98	4.12
492	0	0	364	20.7	3.98
492	0	0	28	6.79	3.28
393.6	98.4	0	364	21.7	2.92
393.6	98.4	0	182	17.34	2.79
393.6	98.4	0	91	12.79	3.62
295.2	196.8	0	91	14.7	2.26
344.4	147.6	0	28	7.71	4.62
393.6	98.4	0	182	18.04	2.92
295.2	0	196.8	182	18.56	2.91
492	0	0	182	16.12	4.72
393.6	0	98.4	364	23.95	3.84
344.4	0	147.6	182	22.72	3.78
344.4	147.6	0	364	21.88	2.68
393.6	0	98.4	182	18.82	3.02
344.4	0	147.6	28	9.23	2.81
492	0	0	28	6.36	4.28
492	0	0	182	16.5	3.98
393.6	98.4	0	364	21.7	3.78
295.2	0	196.8	364	22.05	1.46
295.2	196.8	0	182	19.2	2.7
344.4	0	147.6	182	20.54	3.76
344.4	147.6	0	28	7.96	3.68
295.2	196.8	0	182	19.29	2.28
344.4	147.6	0	28	7.71	3.28
295.2	0	196.8	364	21.92	2.96
393.6	0	98.4	91	15.98	3.56
295.2	196.8	0	364	23.04	4.92
344.4	0	147.6	28	9.17	1.86
344.4	0	147.6	364	24.78	4.32
393.6	98.4	0	182	17.34	4.46
295.2	196.8	0	182	19.29	2.42
344.4	0	147.6	28	9.17	3.38
344.4	0	147.6	28	9.23	3.54
393.6	98.4	0	364	22.38	2.16
344.4	147.6	0	28	7.51	2.98
393.6	98.4	0	28	7.36	2.96
344.4	0	147.6	182	20.32	3.46
393.6	0	98.4	364	24.49	1.96
492	0	0	364	19.68	3.46
295.2	196.8	0	182	19.95	4.66
393.6	0	98.4	364	24.49	2.18
295.2	0	196.8	91	14.96	5.58
344.4	147.6	0	28	7.96	4.02
393.6	0	98.4	364	24.49	3.68
492	0	0	364	20.7	1.72
344.4	147.6	0	91	13.38	2.5
344.4	0	147.6	28	9.17	2.16
344.4	147.6	0	364	22.98	3.56
393.6	0	98.4	91	15.84	3.04
393.6	98.4	0	28	7.72	3.34
393.6	0	98.4	28	8.36	3.78
344.4	147.6	0	364	22.98	3.56
393.6	0	98.4	28	8.36	3.22
344.4	0	147.6	364	25.86	2.31
393.6	98.4	0	28	7.36	4.26
492	0	0	91	11.32	4.28
393.6	98.4	0	91	12.79	4.32
344.4	0	147.6	28	8.52	4.78
492	0	0	182	16.12	2.81
295.2	0	196.8	28	6.64	3.38
492	0	0	364	19.68	4.34
295.2	0	196.8	364	21.98	3.58
295.2	0	196.8	364	22.05	4.46
344.4	0	147.6	364	24.78	3.98
344.4	0	147.6	182	20.54	3.56
393.6	0	98.4	364	23.33	3.44
393.6	0	98.4	182	18.82	2.18
393.6	98.4	0	182	18.04	4.46
393.6	0	98.4	28	8.36	3.52
393.6	0	98.4	364	24.49	4.24
492	0	0	364	19.68	3.82
393.6	98.4	0	182	18.04	3.98
393.6	0	98.4	28	8.36	2.68
344.4	147.6	0	91	13.6	3.68
393.6	98.4	0	91	12.79	4.26
344.4	147.6	0	28	7.51	2.02
393.6	0	98.4	364	24.49	3.38
393.6	0	98.4	28	8.91	3.54
344.4	0	147.6	182	20.32	4.66
492	0	0	91	11.32	2.7
295.2	196.8	0	91	14.7	4.08
344.4	147.6	0	182	17.98	4.62
295.2	0	196.8	91	16.19	2.26
295.2	0	196.8	28	6.64	2.31
344.4	0	147.6	91	17.46	1.96
393.6	0	98.4	182	21.45	2.18
295.2	0	196.8	91	14.96	1.79
344.4	0	147.6	182	20.32	4.02
393.6	98.4	0	364	20.04	3.56
393.6	0	98.4	91	15.84	3.34
393.6	0	98.4	91	16.78	3.82
393.6	0	98.4	364	24.49	3.82
344.4	147.6	0	182	17.98	2.68
295.2	0	196.8	28	10.68	3.34
344.4	147.6	0	28	7.51	3.98
492	0	0	182	16.5	4.62
344.4	147.6	0	91	13.52	3.72
492	0	0	91	10.98	4.12
393.6	0	98.4	28	8.24	4.02
344.4	0	147.6	182	20.32	2.92
393.6	0	98.4	182	20.58	3.82
492	0	0	91	11.32	2.68
344.4	0	147.6	28	8.52	2.31
295.2	0	196.8	91	16.19	2.38
